# Supplementary material
Source: Springer Nature journal article supplement (https://www.springermedizin.de/resource/supplementary/12916_2009_214_MOESM13_ESM.pdf/9599408)

**Id, Sex, Study name**

**Relative Risk  
95% CI**

**Relative Risk  
95% CI**

**USA**

**1 M NHANES I**

**2 F NHANES I**

**3 M CPS-I**

**6 M CPS-II**

**12 M+F Sterling et al 1992**

**Subtotal (95% CI)**

**SCANDINAVIA**

**9 M Swedish construction workers**

**10 M Uppsala County**

**Subtotal (95% CI)**

**Total (95% CI)**

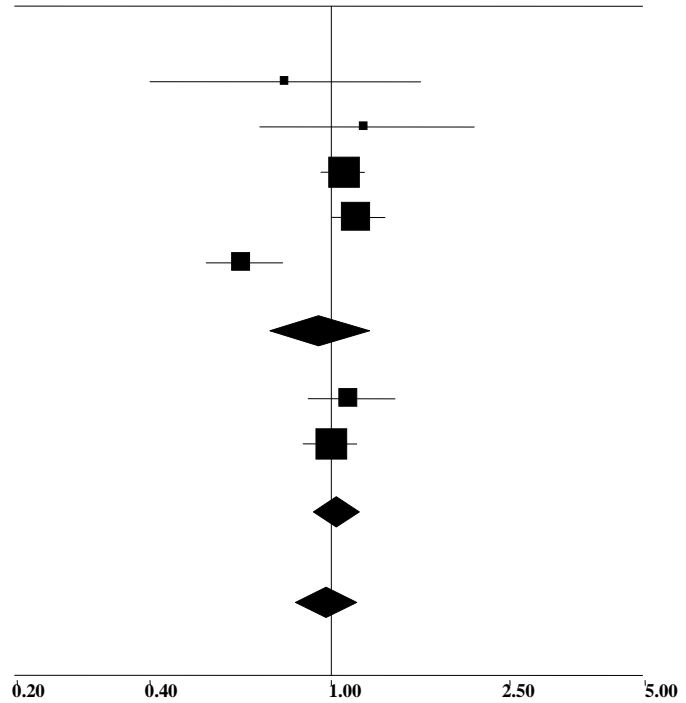

Supplement: MOESM13 [file 9599408]
